# Supplementary material
Source: MDPI journal article supplement (https://www.mdpi.com/2073-4395/13/10/2622)
Supplement: s1 [file s1]

**Table S1.** Amylose content (AC), alkali spreading score (ASS), gelatinization temperature (GT) and starch type of 167 indigenous rice varieties.

| No. | Accession | AC (%) | ASS  | GT                | Starch type |
|-----|-----------|--------|------|-------------------|-------------|
| 1   | ULR 002   | 14.54  | 6.00 | low               | NG          |
| 2   | ULR 003   | 8.38   | 7.00 | low               | G           |
| 3   | ULR 010   | 17.05  | 4.94 | intermediate      | G           |
| 4   | ULR 018   | 9.41   | 3.61 | intermediate      | G           |
| 5   | ULR 022   | 1.53   | 6.00 | intermediate      | G           |
| 6   | ULR 024   | 17.41  | 5.00 | intermediate      | NG          |
| 7   | ULR 031   | 7.67   | 4.72 | intermediate      | G           |
| 8   | ULR 032   | 8.63   | 5.00 | intermediate      | G           |
| 9   | ULR 034   | 2.21   | 5.06 | intermediate      | G           |
| 10  | ULR 036   | 6.92   | 6.00 | low               | G           |
| 11  | ULR 037   | 3.68   | 5.00 | intermediate      | G           |
| 12  | ULR 038   | 3.84   | 6.00 | low               | G           |
| 13  | ULR 040   | 15.14  | 6.11 | low               | NG          |
| 14  | ULR 046   | 7.66   | 6.00 | low               | G           |
| 15  | ULR 048   | 21.94  | 5.28 | intermediate      | NG          |
| 16  | ULR 052   | 11.16  | 6.28 | low               | NG          |
| 17  | ULR 053   | 18.98  | 5.00 | intermediate      | NG          |
| 18  | ULR 056   | 1.82   | 5.11 | intermediate      | G           |
| 19  | ULR 059   | 21.48  | 5.44 | intermediate      | NG          |
| 20  | ULR 060   | 16.57  | 5.00 | intermediate      | G           |
| 21  | ULR 063   | 8.50   | 4.67 | intermediate      | G           |
| 22  | ULR 075   | 36.34  | 3.00 | high-intermediate | NG          |
| 23  | ULR 078   | 8.34   | 6.72 | low               | G           |
| 24  | ULR 083   | 4.53   | 5.00 | intermediate      | G           |
| 25  | ULR 085   | 2.87   | 6.11 | low               | G           |
| 26  | ULR 088   | 2.74   | 3.67 | intermediate      | G           |
| 27  | ULR 090   | 2.13   | 5.00 | intermediate      | G           |
| 28  | ULR 093   | 32.42  | 6.50 | low               | NG          |
| 29  | ULR 101   | 7.45   | 6.00 | low               | G           |
| 30  | ULR 105   | 3.26   | 6.22 | low               | G           |
| 31  | ULR 107   | 2.35   | 4.17 | intermediate      | G           |
| 32  | ULR 108   | 5.61   | 5.17 | intermediate      | G           |
| 33  | ULR 109   | 4.56   | 5.06 | intermediate      | G           |
| 34  | ULR 111   | 2.81   | 7.00 | low               | G           |
| 35  | ULR 117   | 2.43   | 5.00 | intermediate      | G           |
| 36  | ULR 118   | 5.03   | 5.00 | intermediate      | G           |
| 37  | ULR 121   | 8.99   | 5.00 | intermediate      | G           |
| 38  | ULR 122   | 7.73   | 5.11 | intermediate      | G           |
| 39  | ULR 123   | 2.58   | 5.11 | intermediate      | G           |
| 40  | ULR 128   | 13.43  | 6.89 | low               | NG          |
| 41  | ULR 130   | 2.81   | 5.22 | intermediate      | G           |
| 42  | ULR 131   | 9.01   | 6.00 | low               | G           |
| 43  | ULR 132   | 12.25  | 7.00 | low               | NG          |
| 44  | ULR 133   | 8.19   | 6.00 | low               | G           |

|    |         |       |      |                   |    |
|----|---------|-------|------|-------------------|----|
| 45 | ULR 134 | 8.56  | 5.00 | intermediate      | G  |
| 46 | ULR 136 | 3.00  | 4.61 | intermediate      | G  |
| 47 | ULR 137 | 4.07  | 5.56 | low               | G  |
| 48 | ULR 138 | 1.40  | 6.89 | low               | G  |
| 49 | ULR 140 | 24.31 | 6.00 | low               | NG |
| 50 | ULR 142 | 26.20 | 5.00 | intermediate      | NG |
| 51 | ULR 146 | 18.59 | 5.94 | low               | NG |
| 52 | ULR 148 | 7.86  | 5.00 | intermediate      | G  |
| 53 | ULR 149 | 22.80 | 6.72 | low               | NG |
| 54 | ULR 150 | 23.76 | 4.00 | intermediate      | NG |
| 55 | ULR 152 | 37.56 | 5.72 | low               | NG |
| 56 | ULR 153 | 18.32 | 6.00 | low               | NG |
| 57 | ULR 155 | 1.23  | 5.28 | intermediate      | G  |
| 58 | ULR 157 | 4.47  | 5.33 | intermediate      | G  |
| 59 | ULR 158 | 23.26 | 6.28 | low               | NG |
| 60 | ULR 161 | 8.29  | 5.22 | intermediate      | G  |
| 61 | ULR 164 | 4.47  | 6.00 | low               | G  |
| 62 | ULR 165 | 1.92  | 6.00 | low               | G  |
| 63 | ULR 166 | 25.67 | 4.67 | intermediate      | NG |
| 64 | ULR 168 | 17.46 | 6.50 | low               | NG |
| 65 | ULR 169 | 18.66 | 5.00 | intermediate      | NG |
| 66 | ULR 170 | 8.46  | 6.00 | low               | G  |
| 67 | ULR 172 | 10.79 | 5.00 | intermediate      | G  |
| 68 | ULR 173 | 2.53  | 4.00 | intermediate      | G  |
| 69 | ULR 174 | 17.61 | 6.00 | low               | NG |
| 70 | ULR 177 | 6.60  | 5.33 | intermediate      | G  |
| 71 | ULR 180 | 3.04  | 6.44 | low               | G  |
| 72 | ULR 185 | 27.27 | 4.06 | intermediate      | NG |
| 73 | ULR 189 | 20.46 | 5.61 | low               | NG |
| 74 | ULR 190 | 19.19 | 5.50 | low               | NG |
| 75 | ULR 194 | 16.28 | 5.00 | intermediate      | G  |
| 76 | ULR 195 | 19.66 | 5.44 | intermediate      | NG |
| 77 | ULR 201 | 20.73 | 5.00 | intermediate      | NG |
| 78 | ULR 204 | 12.83 | 3.11 | high-intermediate | G  |
| 79 | ULR 210 | 23.01 | 5.00 | intermediate      | NG |
| 80 | ULR 211 | 9.33  | 6.00 | low               | G  |
| 81 | ULR 212 | 18.57 | 4.33 | intermediate      | NG |
| 82 | ULR 213 | 6.06  | 5.00 | intermediate      | G  |
| 83 | ULR 215 | 11.66 | 5.28 | intermediate      | NG |
| 84 | ULR 217 | 23.31 | 6.00 | low               | NG |
| 85 | ULR 218 | 6.89  | 5.00 | intermediate      | G  |
| 86 | ULR 219 | 13.72 | 5.33 | intermediate      | NG |
| 87 | ULR 220 | 19.62 | 5.17 | intermediate      | NG |
| 88 | ULR 222 | 24.56 | 5.00 | intermediate      | NG |
| 89 | ULR 225 | 11.34 | 5.00 | intermediate      | NG |
| 90 | ULR 226 | 2.29  | 5.00 | intermediate      | G  |
| 91 | ULR 227 | 16.90 | 5.22 | intermediate      | NG |

|     |         |       |      |                   |    |
|-----|---------|-------|------|-------------------|----|
| 92  | ULR 229 | 9.28  | 5.00 | intermediate      | G  |
| 93  | ULR 230 | 8.65  | 5.00 | intermediate      | G  |
| 94  | ULR 231 | 3.41  | 6.61 | low               | G  |
| 95  | ULR 232 | 19.03 | 5.00 | intermediate      | NG |
| 96  | ULR 235 | 32.17 | 7.00 | low               | NG |
| 97  | ULR 237 | 2.29  | 6.00 | low               | G  |
| 98  | ULR 238 | 2.02  | 5.17 | intermediate      | G  |
| 99  | ULR 240 | 9.44  | 5.00 | intermediate      | G  |
| 100 | ULR 241 | 0.64  | 6.89 | low               | G  |
| 101 | ULR 242 | 9.01  | 4.00 | intermediate      | G  |
| 102 | ULR 244 | 7.58  | 5.00 | intermediate      | G  |
| 103 | ULR 246 | 31.93 | 5.00 | intermediate      | NG |
| 104 | ULR 247 | 4.17  | 5.11 | intermediate      | G  |
| 105 | ULR 248 | 2.64  | 6.17 | low               | G  |
| 106 | ULR 249 | 4.78  | 6.33 | low               | G  |
| 107 | ULR 250 | 1.76  | 6.00 | low               | G  |
| 108 | ULR 251 | 1.79  | 4.94 | intermediate      | G  |
| 109 | ULR 253 | 33.44 | 3.00 | high-intermediate | NG |
| 110 | ULR 258 | 3.50  | 5.00 | intermediate      | G  |
| 111 | ULR 259 | 2.22  | 5.39 | intermediate      | G  |
| 112 | ULR 264 | 14.08 | 6.83 | low               | NG |
| 113 | ULR 265 | 2.75  | 4.39 | intermediate      | G  |
| 114 | ULR 267 | 9.05  | 6.00 | low               | G  |
| 115 | ULR 268 | 13.85 | 7.00 | low               | NG |
| 116 | ULR 273 | 4.94  | 5.06 | intermediate      | G  |
| 117 | ULR 274 | 23.97 | 2.50 | high-intermediate | NG |
| 118 | ULR 285 | 28.96 | 6.00 | low               | NG |
| 119 | ULR 291 | 27.72 | 4.00 | intermediate      | NG |
| 120 | ULR 293 | 7.48  | 5.56 | low               | G  |
| 121 | ULR 294 | 2.37  | 4.00 | intermediate      | G  |
| 122 | ULR 295 | 6.97  | 6.00 | low               | G  |
| 123 | ULR 296 | 9.29  | 5.06 | intermediate      | G  |
| 124 | ULR 299 | 7.92  | 6.00 | low               | G  |
| 125 | ULR 300 | 23.61 | 7.00 | low               | NG |
| 126 | ULR 301 | 3.80  | 6.00 | low               | G  |
| 127 | ULR 302 | 4.27  | 6.22 | low               | G  |
| 128 | ULR 306 | 6.77  | 4.72 | intermediate      | G  |
| 129 | ULR 307 | 16.55 | 5.00 | intermediate      | NG |
| 130 | ULR 308 | 1.79  | 5.72 | low               | G  |
| 131 | ULR 309 | 5.19  | 5.44 | intermediate      | G  |
| 132 | ULR 310 | 4.97  | 4.50 | intermediate      | G  |
| 133 | ULR 312 | 2.82  | 6.00 | low               | G  |
| 134 | ULR 320 | 3.43  | 6.00 | low               | G  |
| 135 | ULR 323 | 6.39  | 4.06 | intermediate      | G  |
| 136 | ULR 324 | 16.39 | 6.11 | low               | NG |
| 137 | ULR 330 | 8.67  | 7.00 | low               | G  |
| 138 | ULR 331 | 9.05  | 5.39 | intermediate      | G  |

|     |         |       |      |              |    |
|-----|---------|-------|------|--------------|----|
| 139 | ULR 333 | 27.47 | 4.61 | intermediate | NG |
| 140 | ULR 335 | 18.97 | 7.00 | low          | NG |
| 141 | ULR 339 | 20.39 | 5.00 | intermediate | NG |
| 142 | ULR 346 | 22.51 | 4.00 | intermediate | NG |
| 143 | ULR 351 | 14.93 | 5.00 | intermediate | G  |
| 144 | ULR 353 | 3.94  | 6.00 | low          | G  |
| 145 | ULR 355 | 20.15 | 5.11 | intermediate | NG |
| 146 | ULR 356 | 20.54 | 5.06 | intermediate | NG |
| 147 | ULR 362 | 21.87 | 5.00 | intermediate | NG |
| 148 | ULR 364 | 1.81  | 6.00 | low          | G  |
| 149 | ULR 366 | 2.52  | 5.00 | intermediate | G  |
| 150 | ULR 379 | 10.02 | 4.00 | intermediate | G  |
| 151 | ULR 380 | 9.32  | 4.00 | intermediate | G  |
| 152 | ULR 382 | 9.11  | 6.00 | low          | G  |
| 153 | ULR 383 | 8.69  | 7.00 | low          | G  |
| 154 | ULR 385 | 8.73  | 4.61 | intermediate | G  |
| 155 | ULR 386 | 9.36  | 5.00 | intermediate | G  |
| 156 | ULR 387 | 10.39 | 5.00 | intermediate | G  |
| 157 | ULR 388 | 16.73 | 5.11 | intermediate | NG |
| 158 | ULR 389 | 9.93  | 5.00 | intermediate | G  |
| 159 | ULR 394 | 1.22  | 7.00 | low          | G  |
| 160 | ULR 397 | 2.43  | 4.00 | intermediate | G  |
| 161 | ULR 398 | 16.49 | 5.11 | intermediate | NG |
| 162 | ULR 401 | 17.85 | 5.00 | intermediate | NG |
| 163 | ULR 402 | 4.33  | 4.89 | intermediate | G  |
| 164 | ULR 412 | 3.80  | 5.00 | intermediate | G  |
| 165 | ULR 413 | 3.01  | 6.33 | low          | G  |
| 166 | ULR 414 | 15.81 | 5.00 | intermediate | NG |
| 167 | ULR 415 | 3.09  | 4.11 | intermediate | G  |

AC=Amylose content, ASC=Alkali spreading score, G=Glutinous, NG=non-glutinous
